# Supplementary figures and images for: Dual modal imaging agents based on chromophore-bearing DTPA analogues
Source: Royal Society of Chemistry journal article supplement (doi:10.1039/c7ra06946d), 2017-01-01

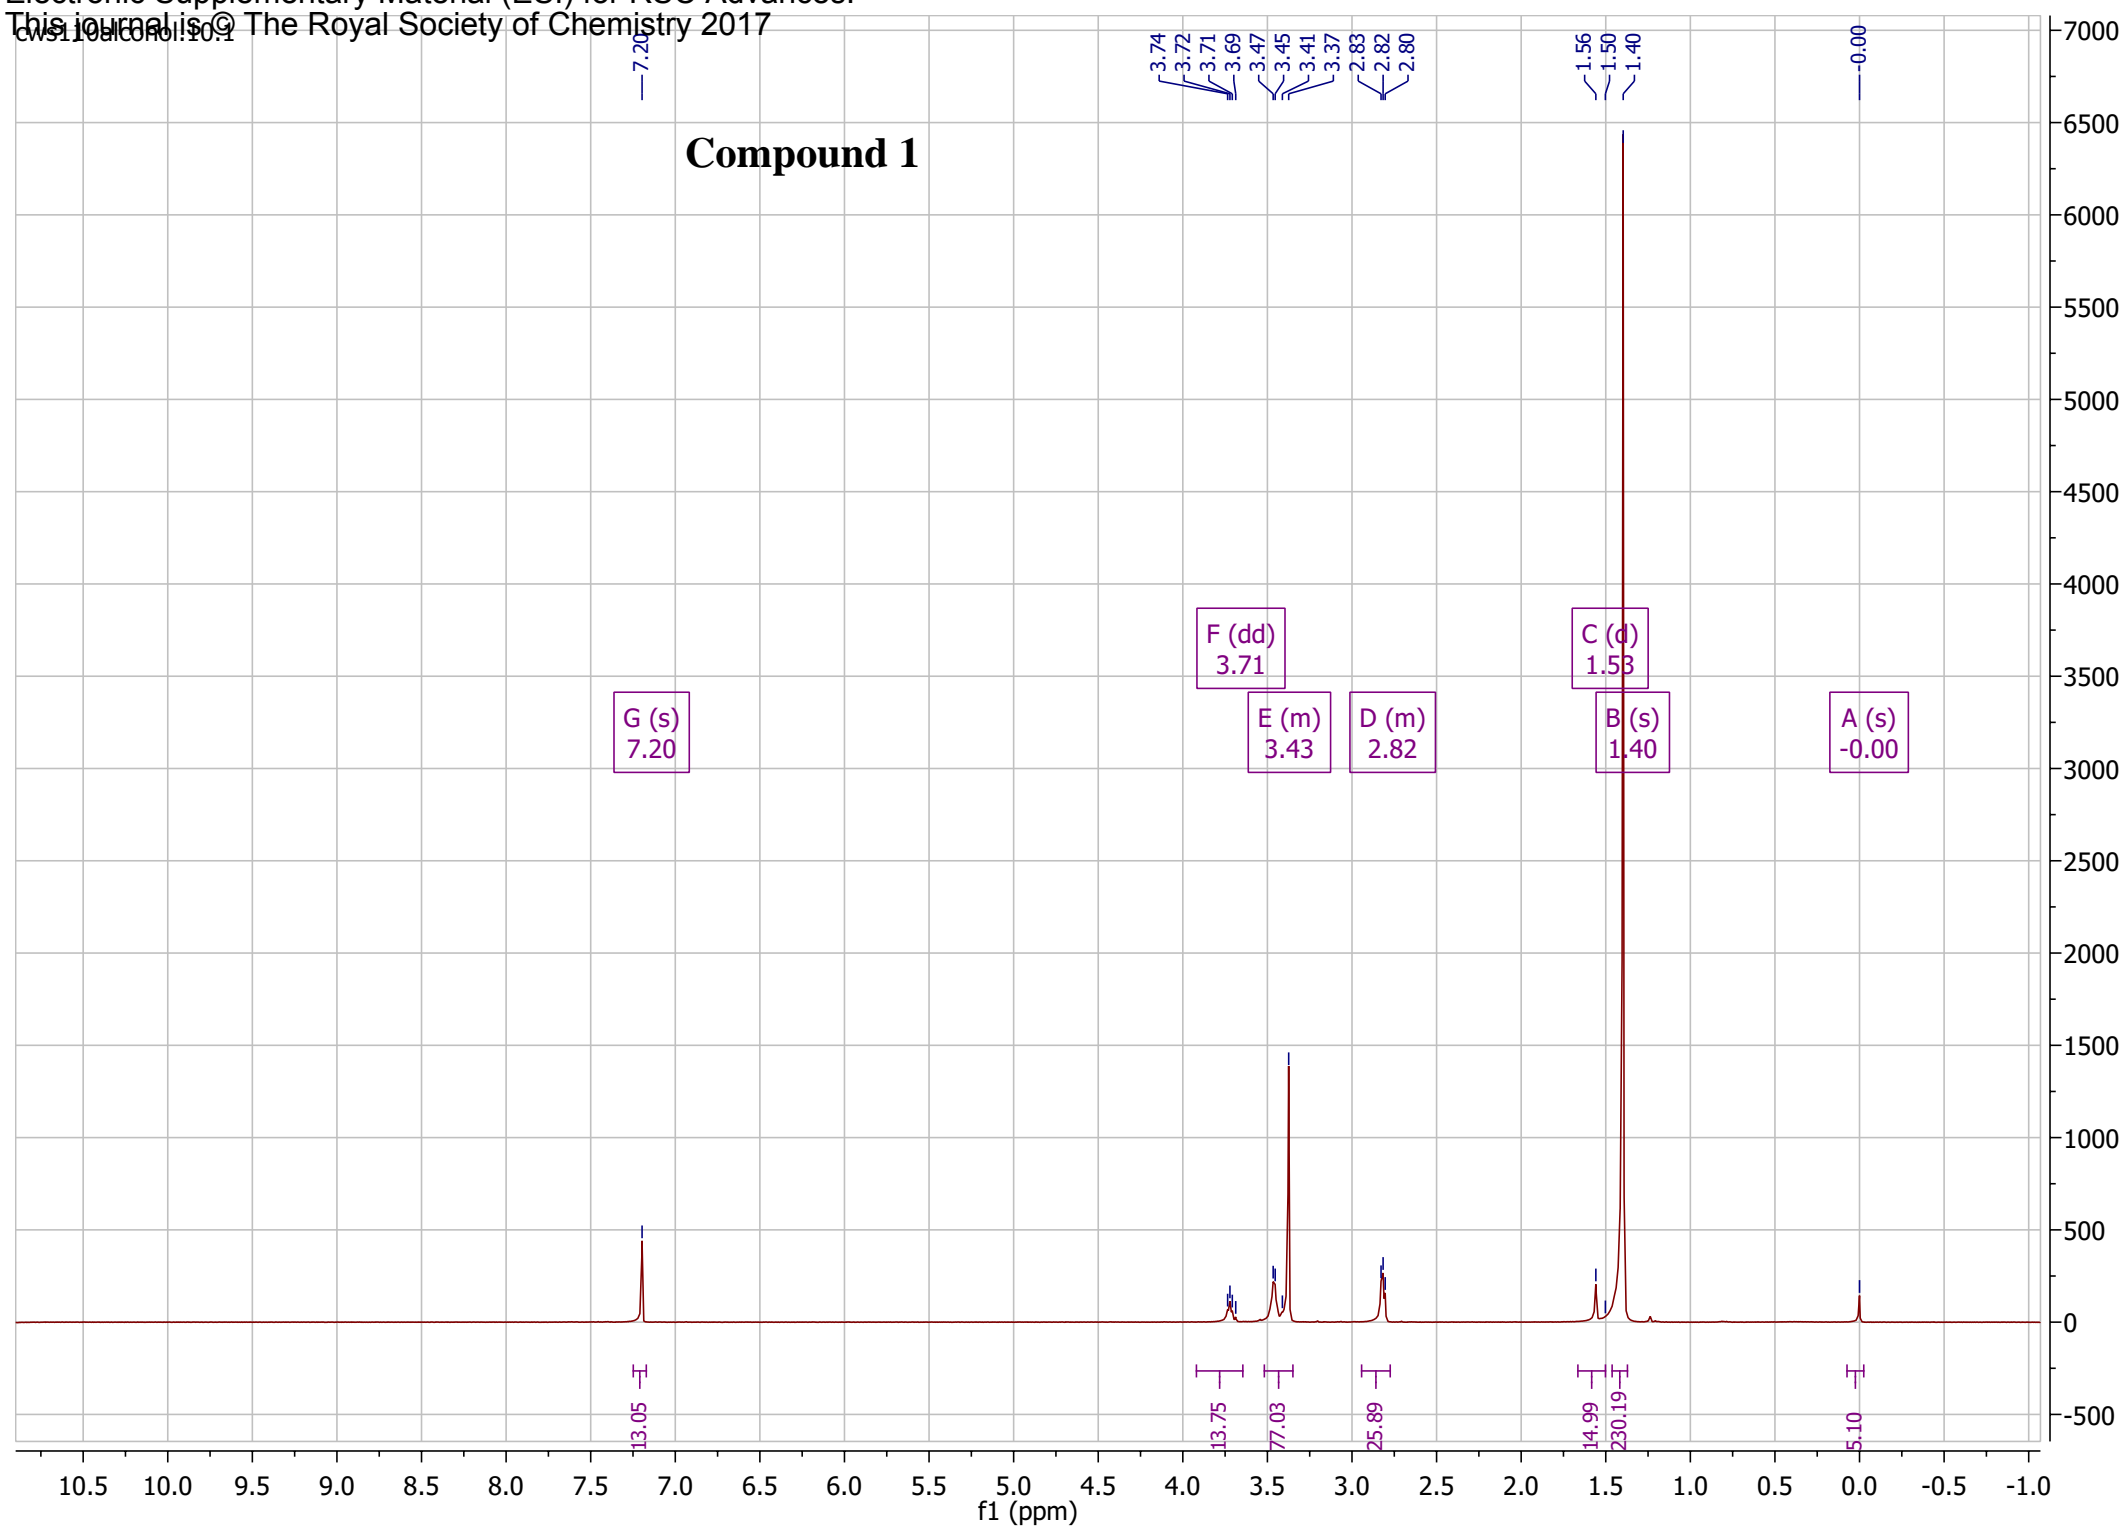

CW9992739.101

# Compound 4

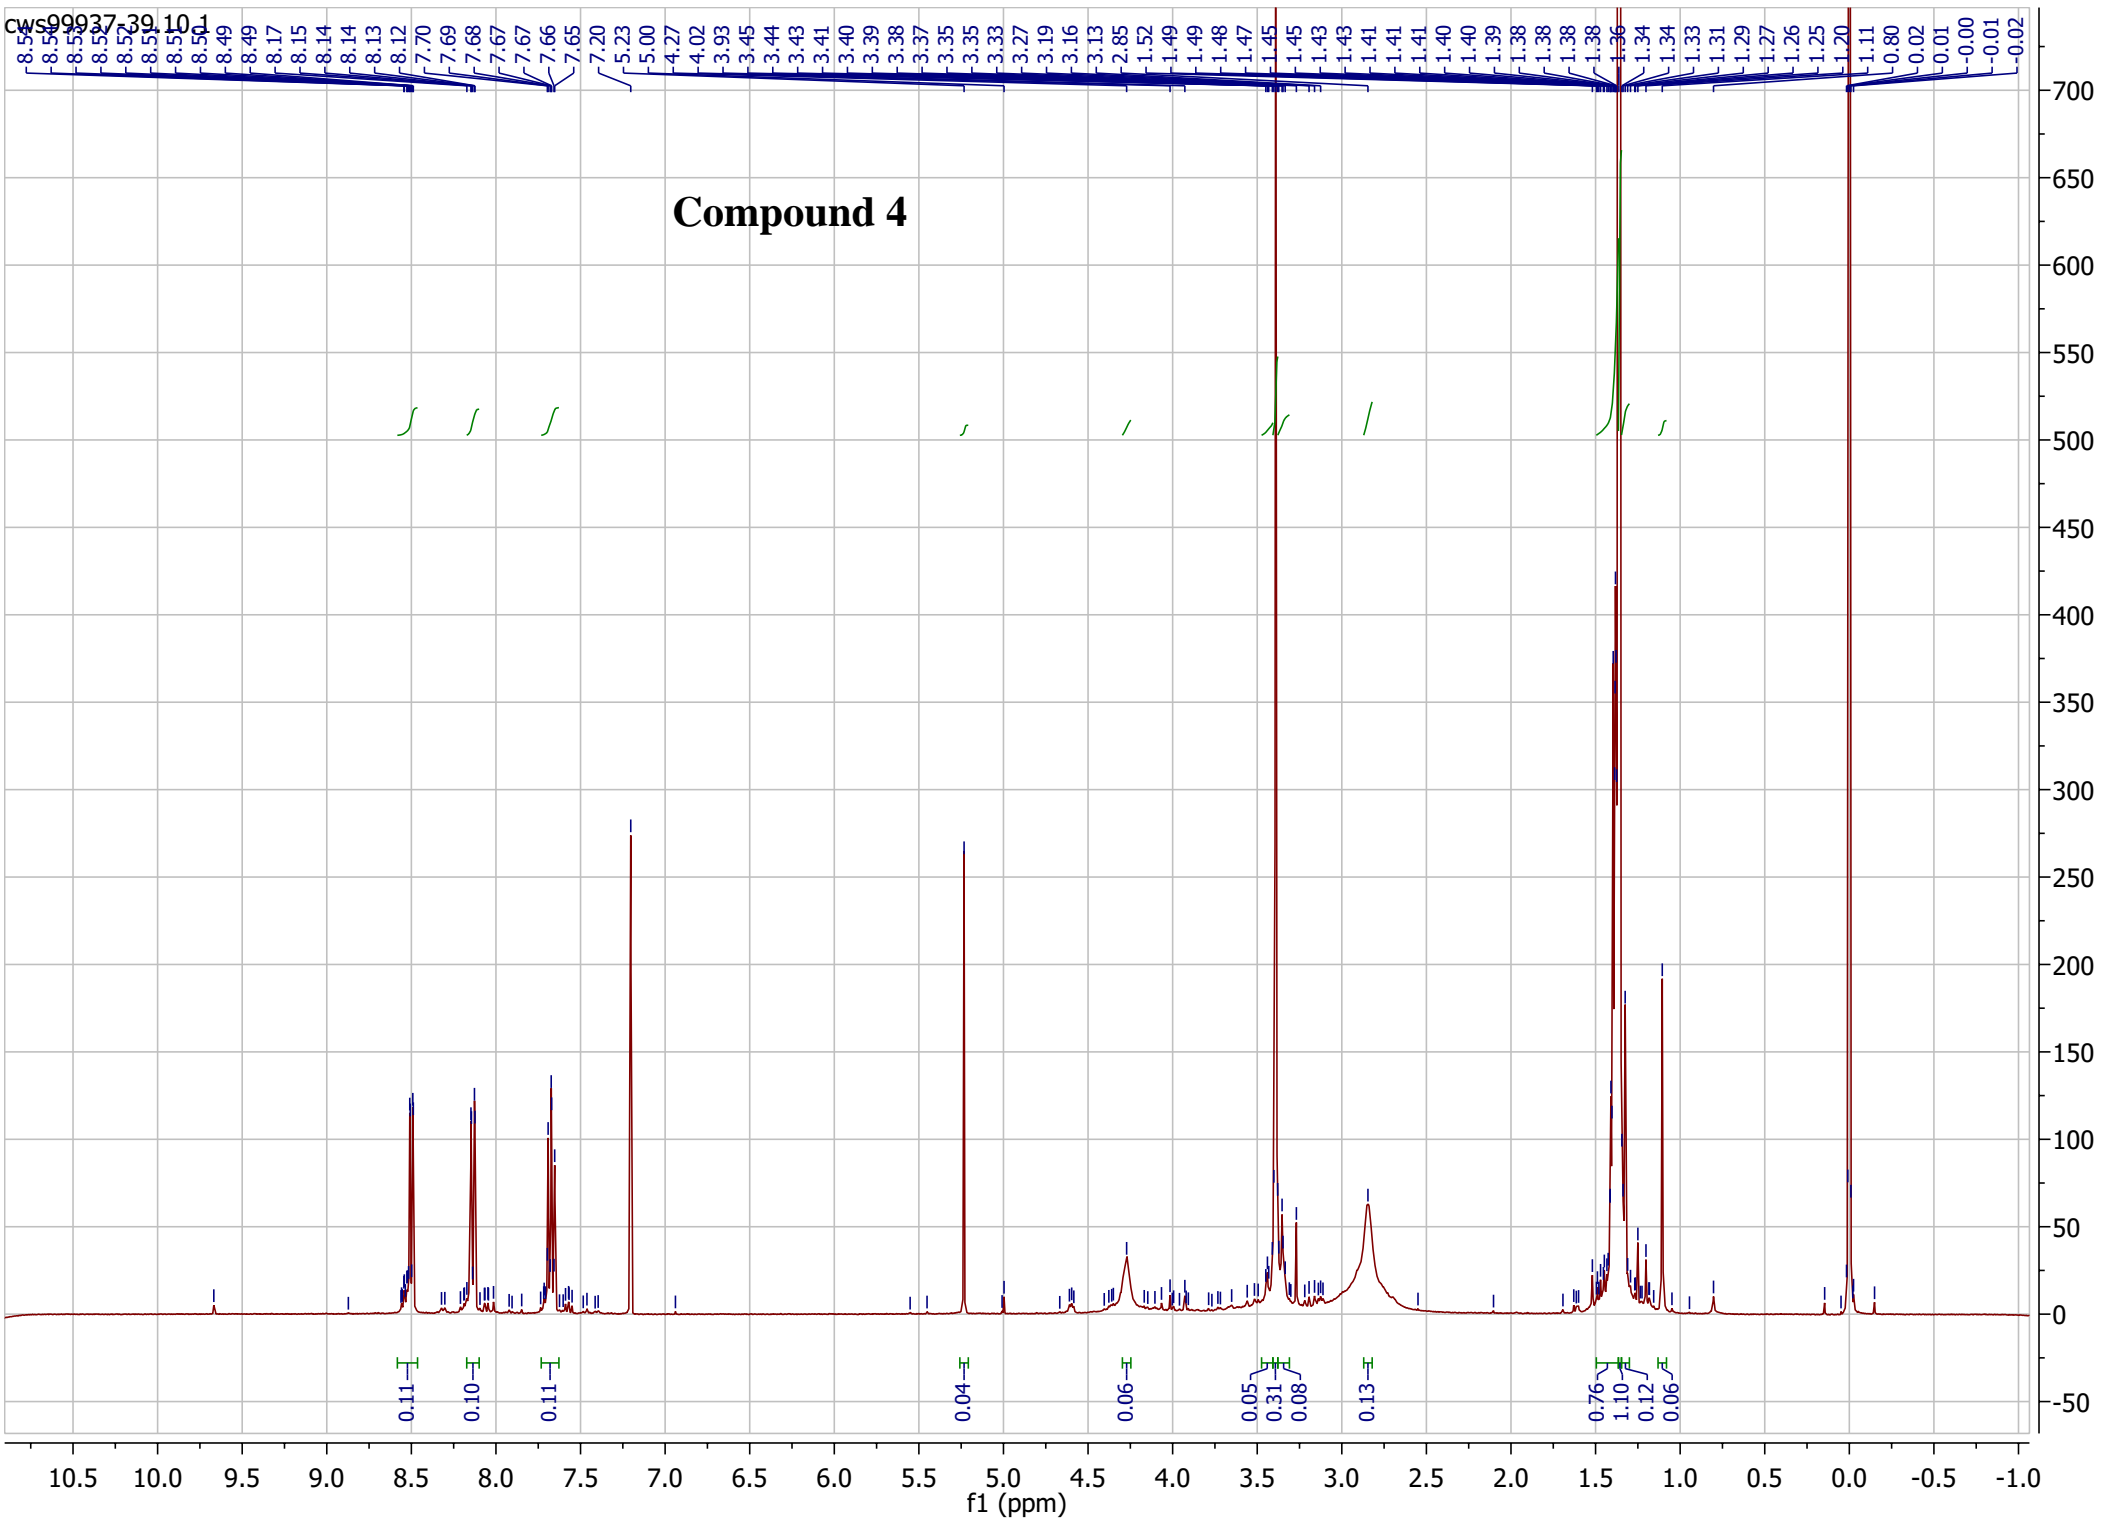

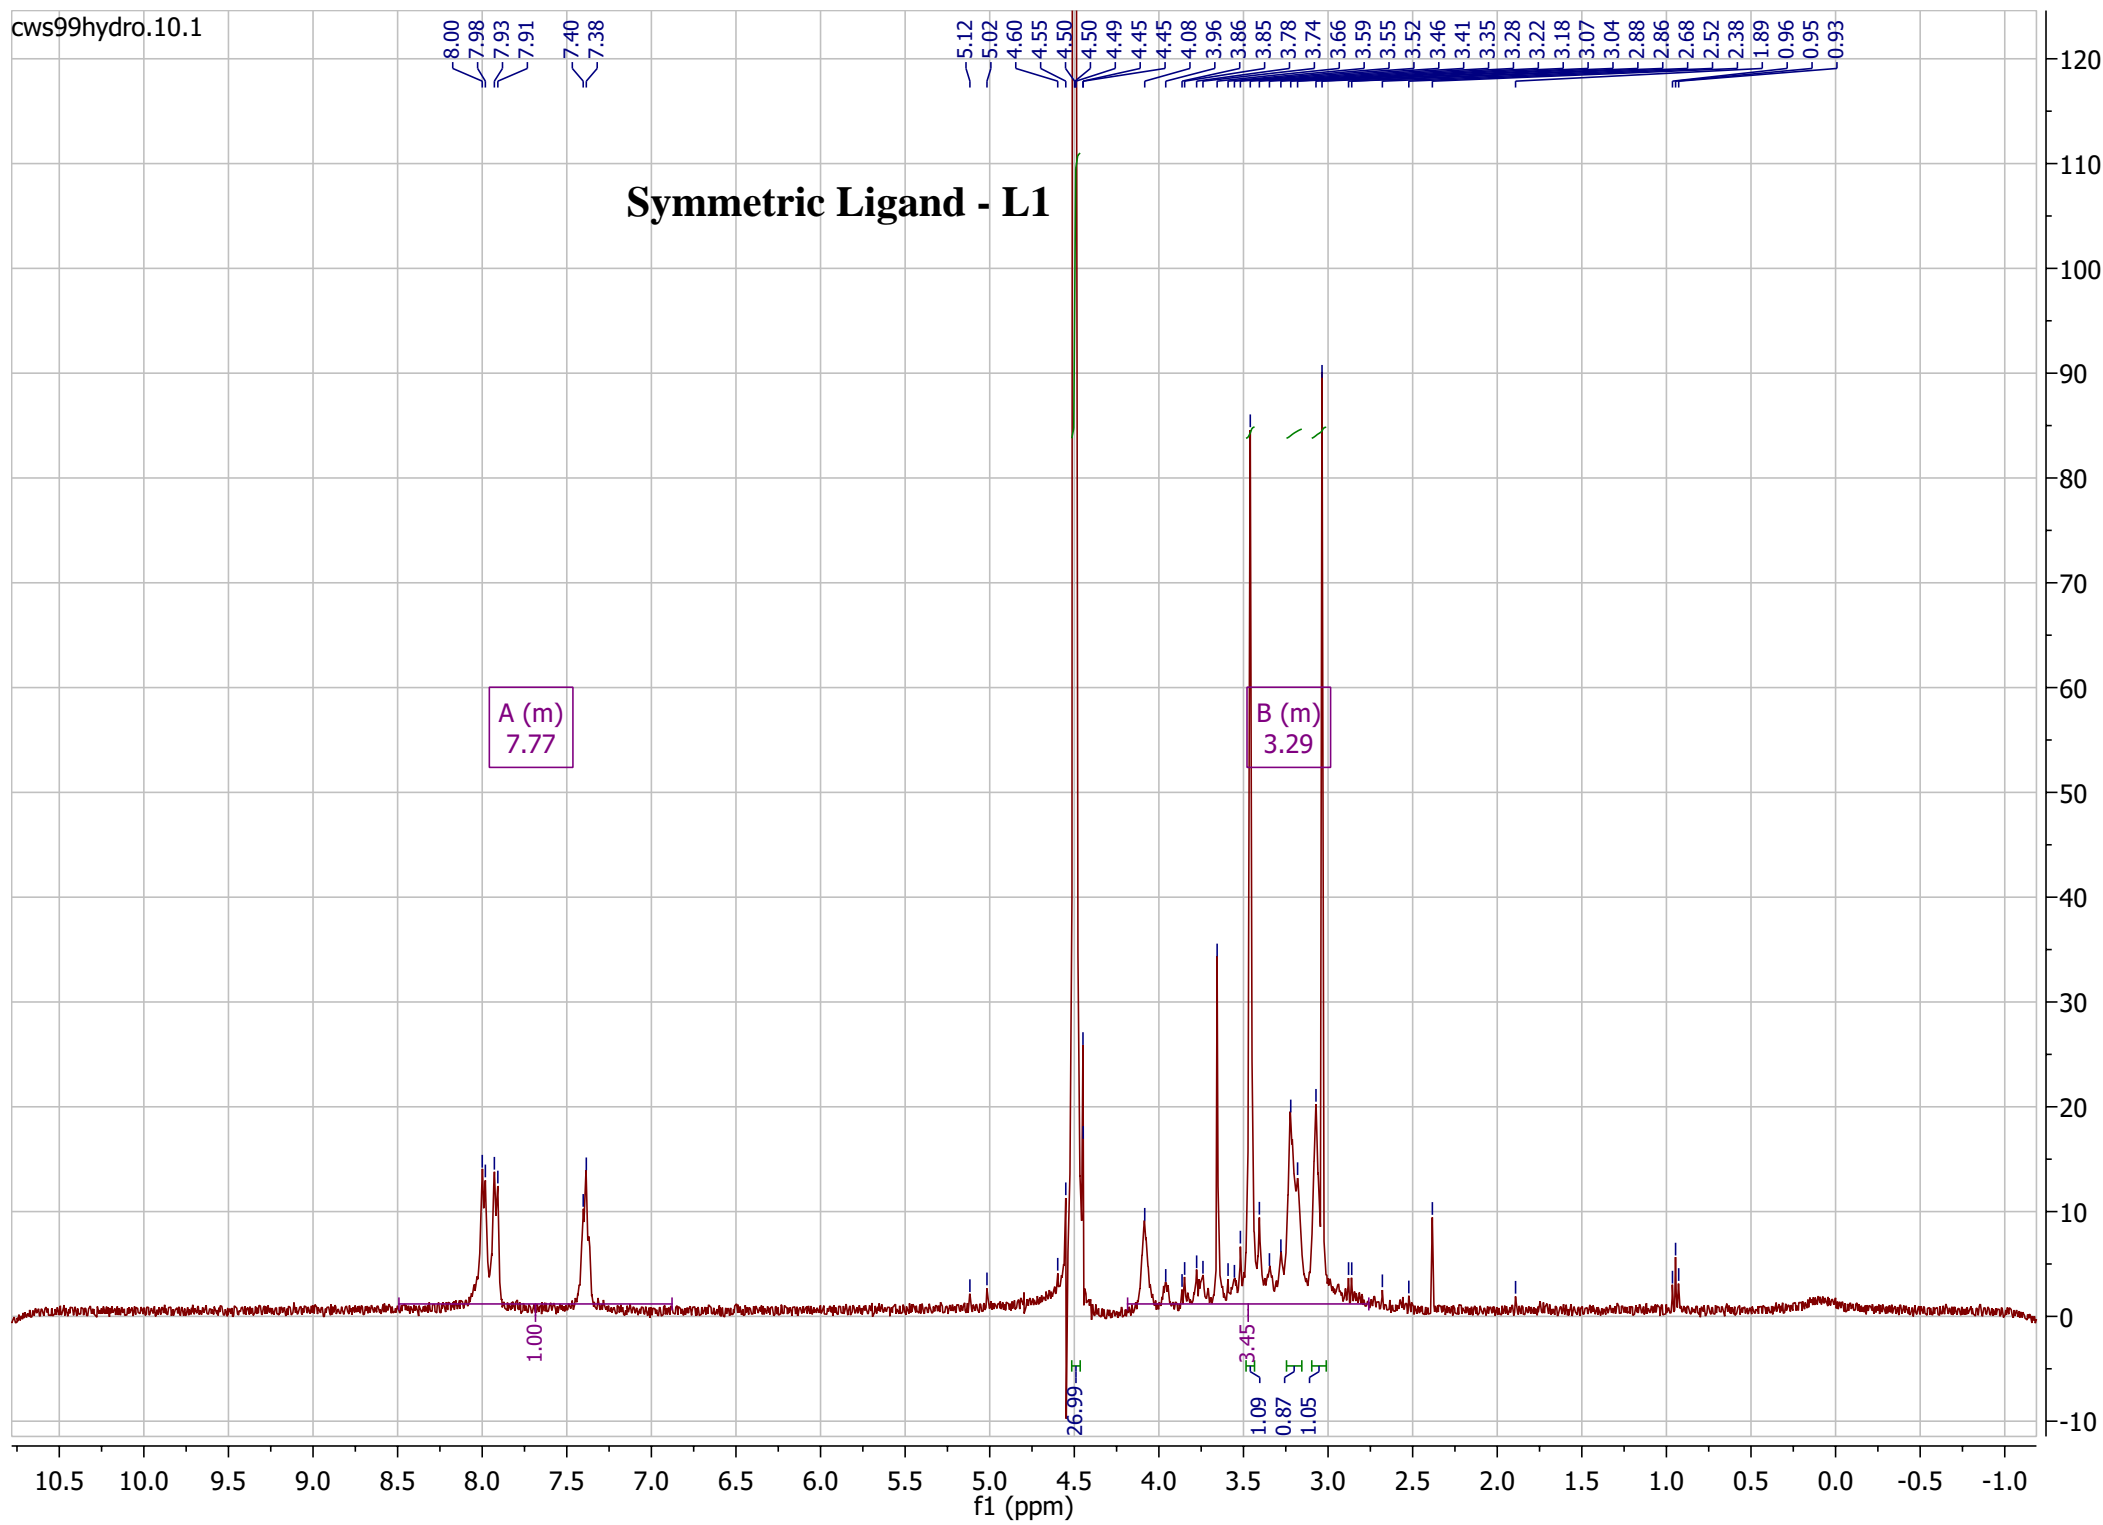

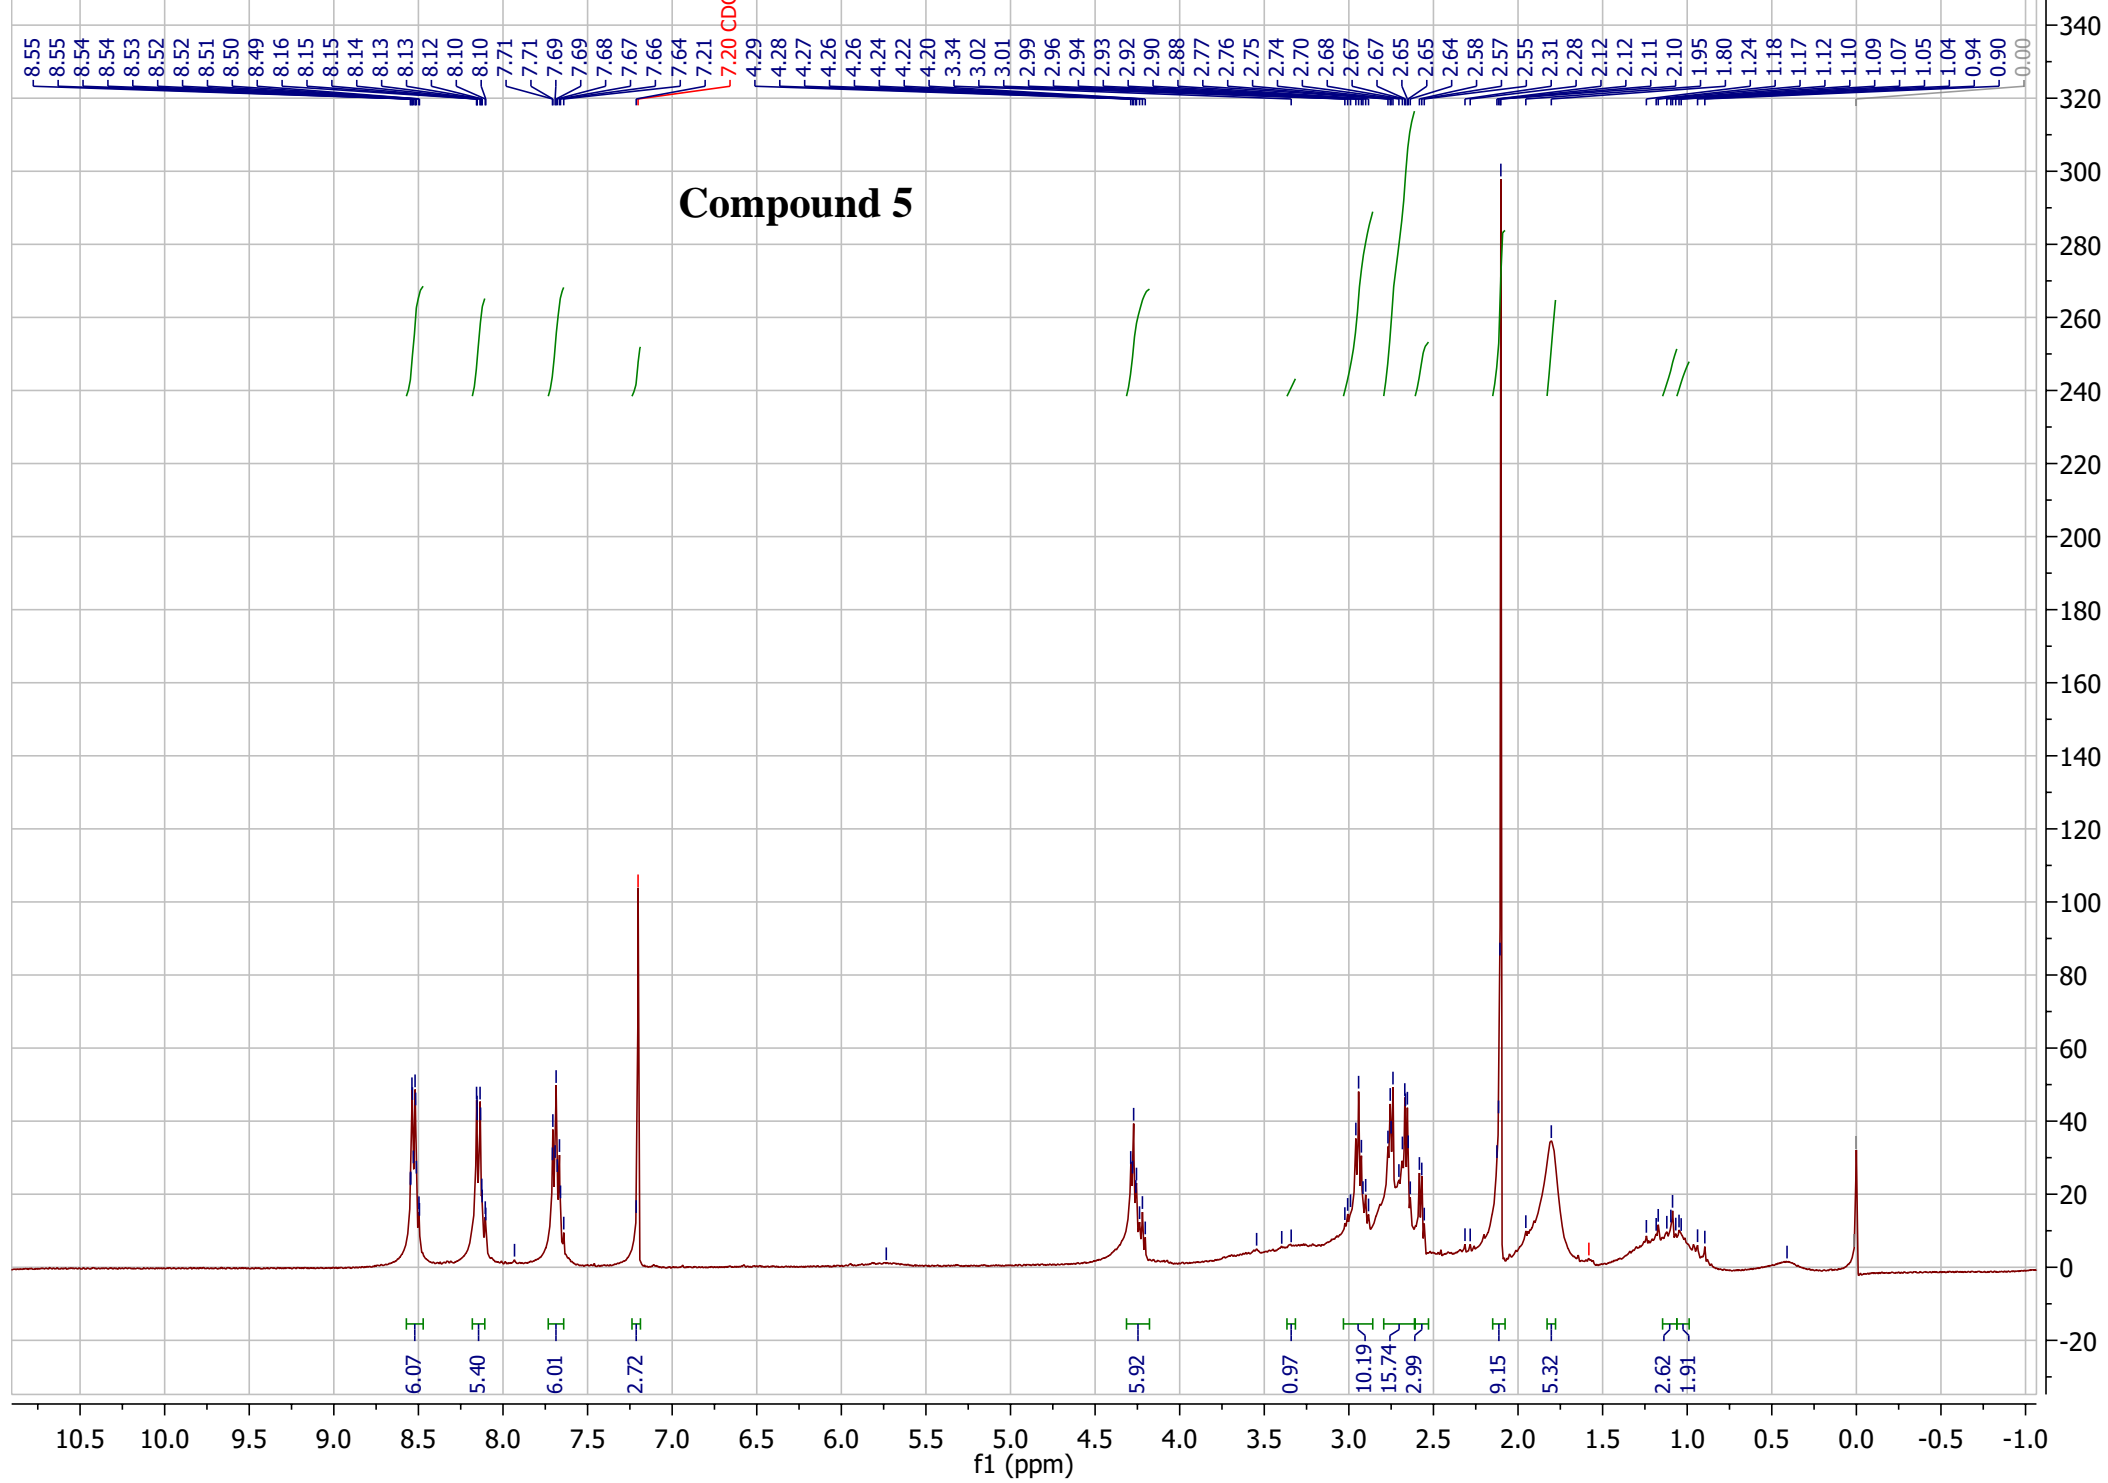

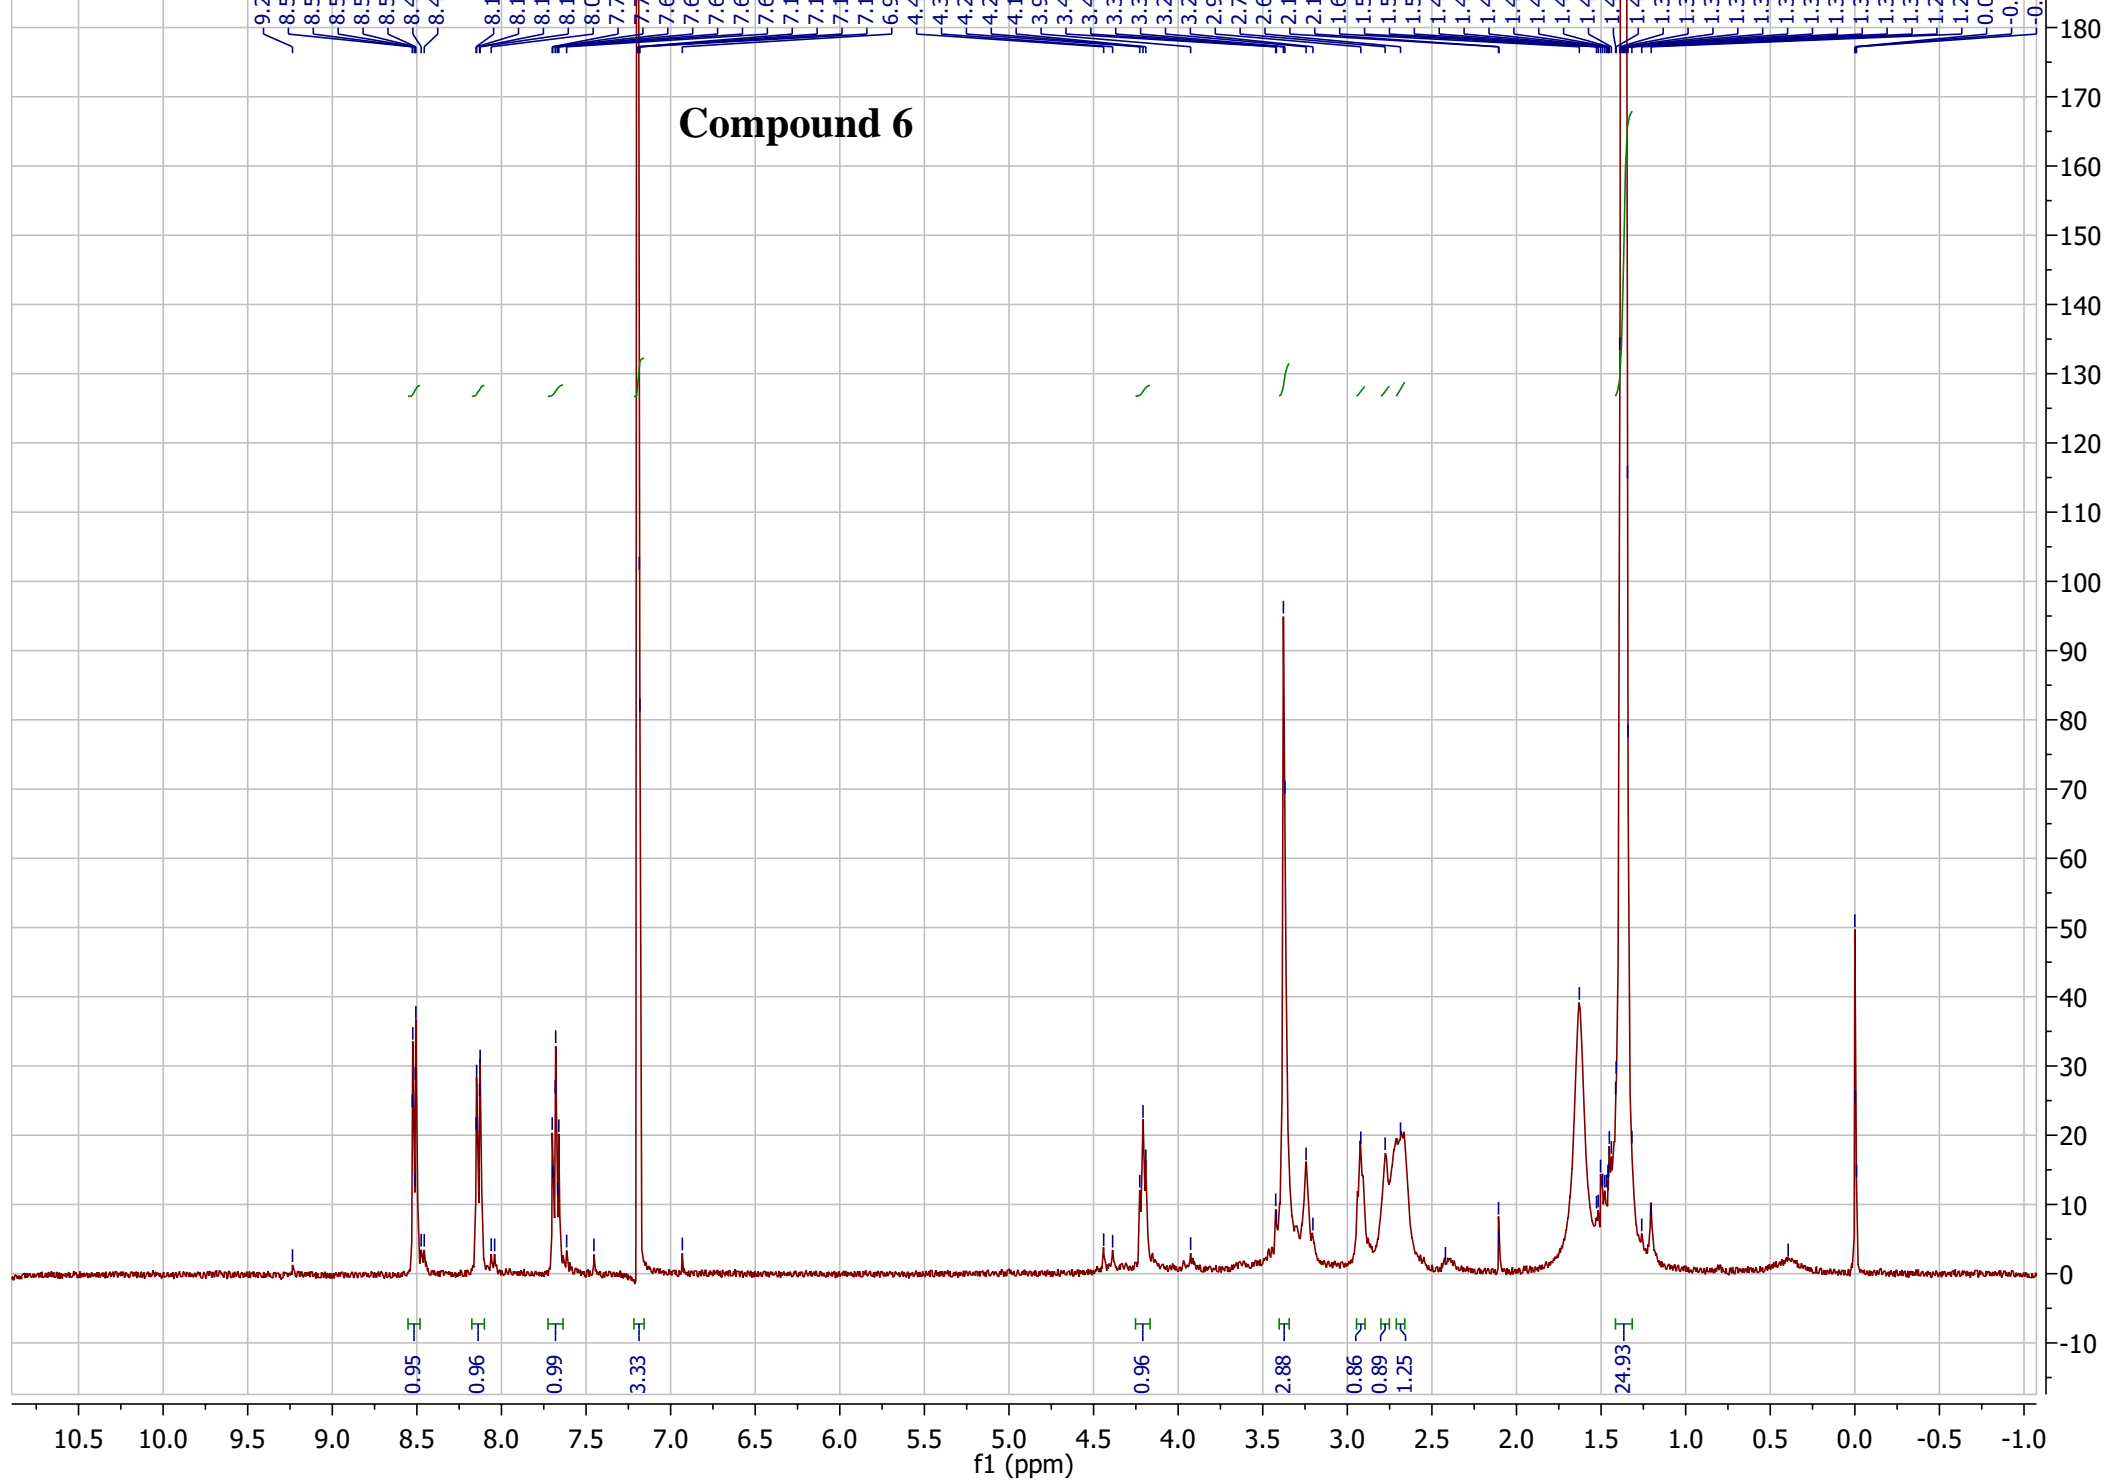

# Asymmetric Ligand-L2

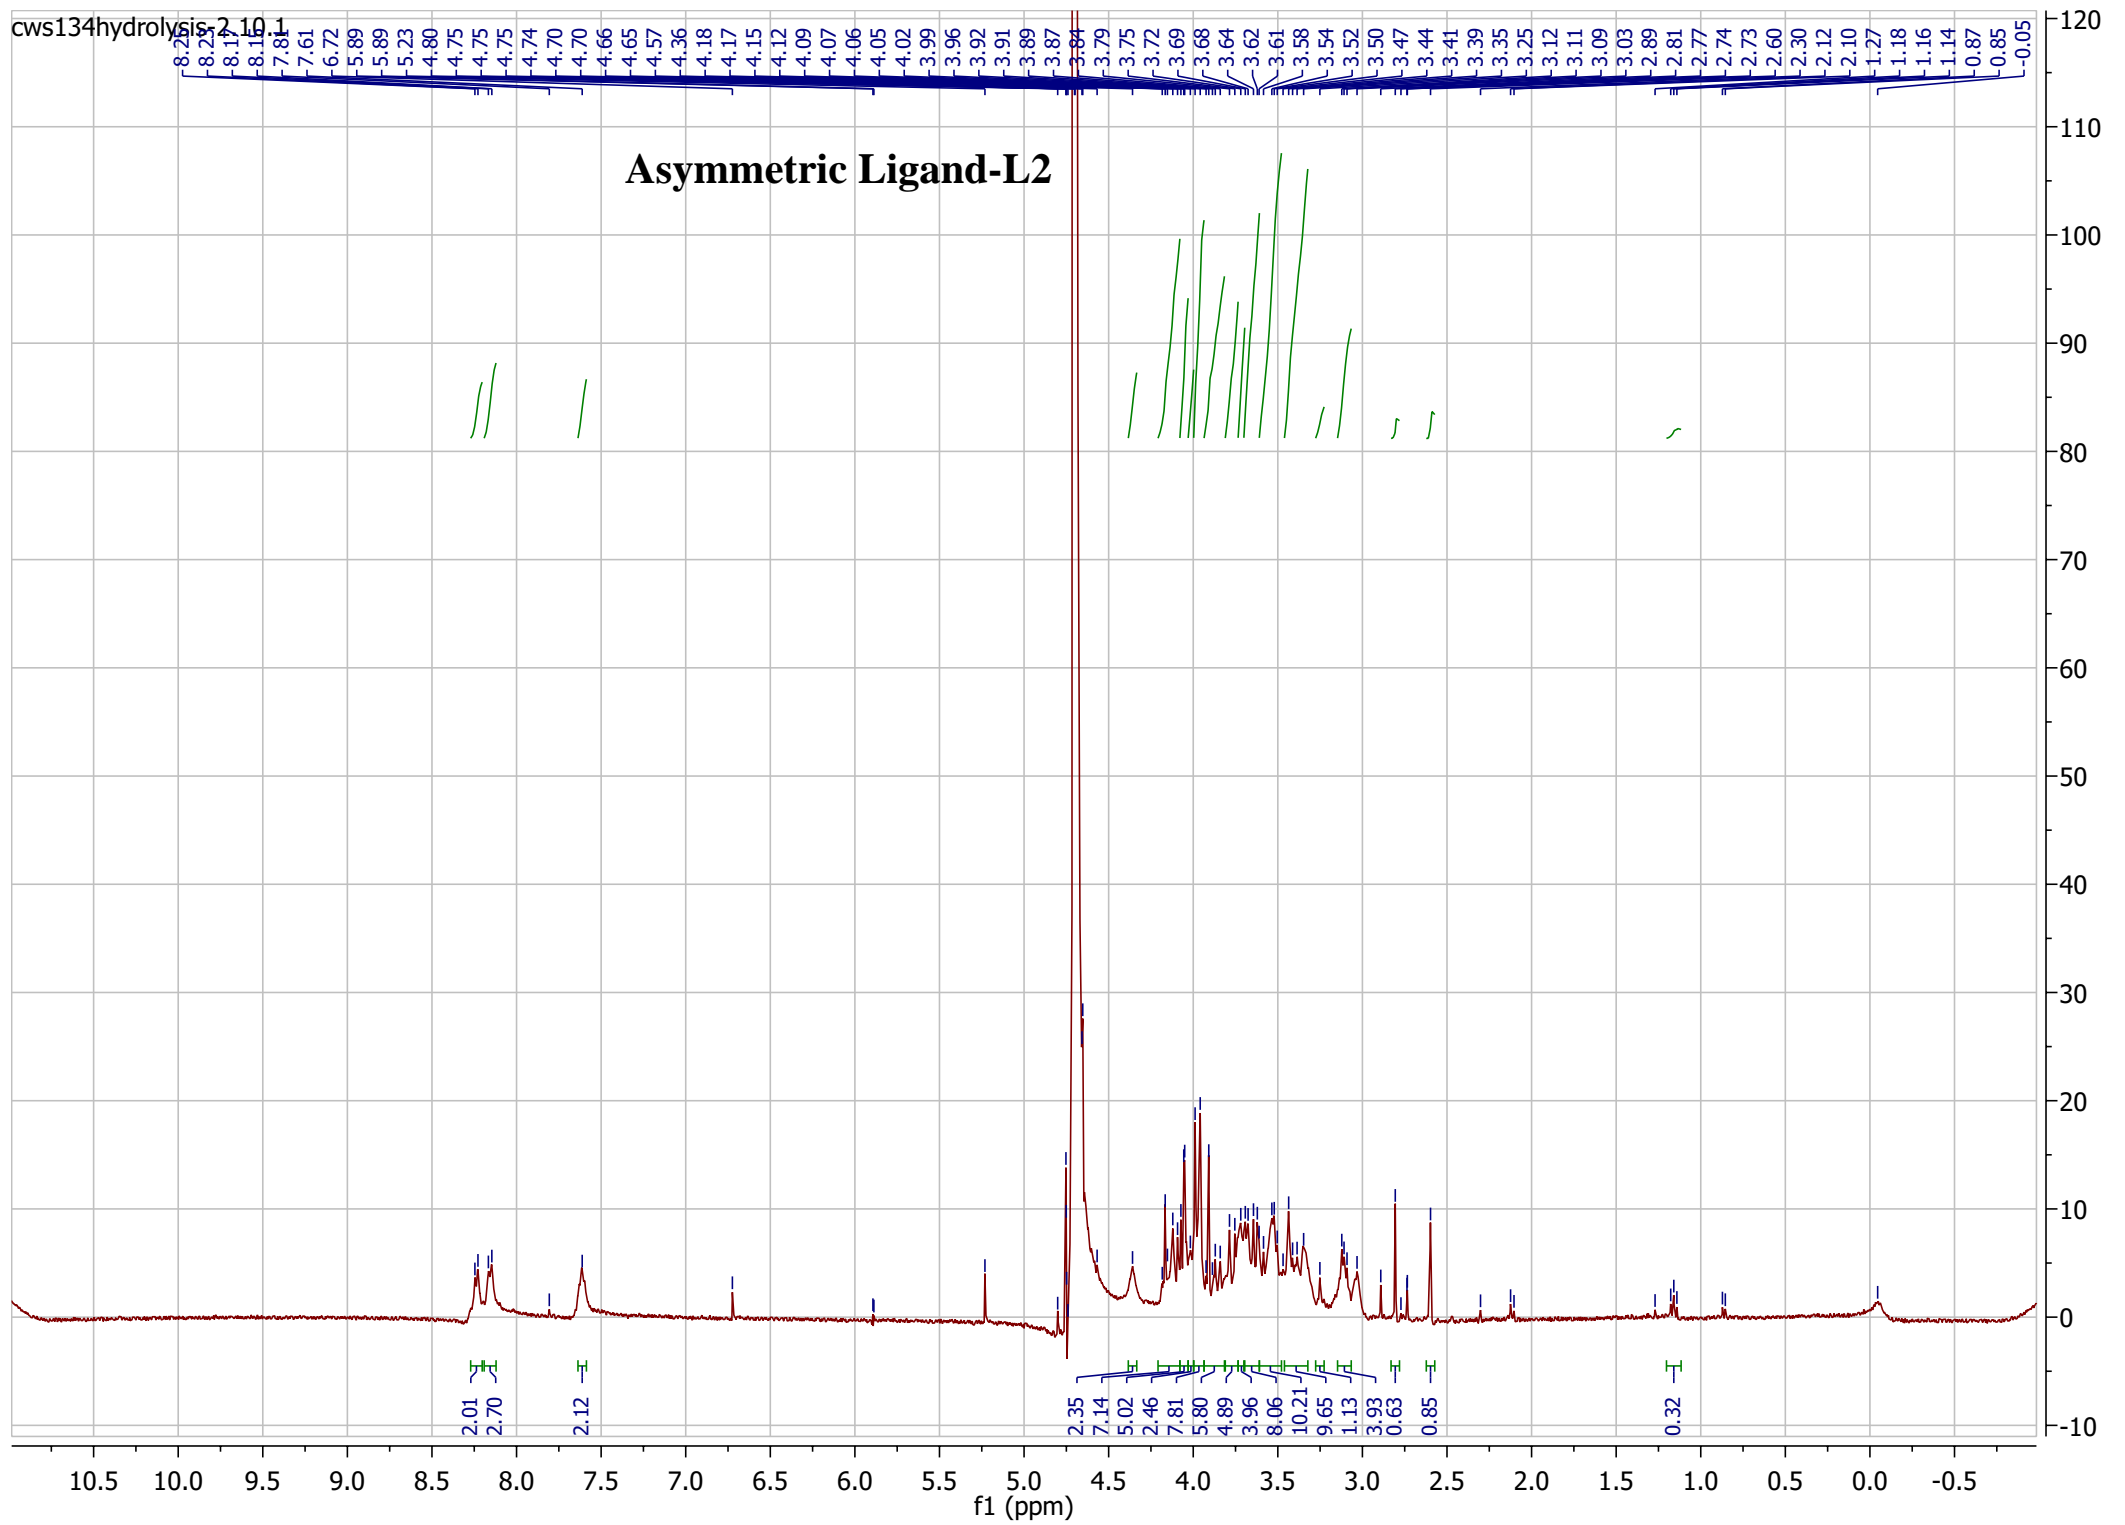

Supplement: c7ra06946d1.pdf [file c7ra06946d1.pdf]
